# Supplementary material for: Phylogeography of high Andean killifishes Orestias (Teleostei: Cyprinodontidae) in Caquena and Lauca sub-basins of the Altiplano (Chile): mitochondrial and nuclear analysis of an endangered fish
Source: PeerJ journal article supplement (doi:10.7717/peerj.11917), 2021-08-20
Supplement: Supplemental_Data_S3.docx [file Supplemental_Data_S3.docx]

| State | Number of cycles | | Time (min: sec) | | Temperature (°C) | |
| --- | --- | --- | --- | --- | --- | --- |
| MIX 1-MIX2 | MIX3 | MIX 1-MIX2 | MIX3 | MIX 1 | MIX2-MIX3 |
| Denaturation | 1 | 1 | 10:00 | 2:00 | 95 | 94 |
| Denaturation | 30 | 35 | 0:30 | 0:30 | 94 | 92 |
| Annealing | 1:30 | 0:30 | 60 | 51 |
| Extension | 1:00 | 1:00 | 72 | 72 |
| Extension | 1 | 1 | 30:00 | 20:00 | 60 | 72 |
